# Supplementary material for: Enhanced thermal effect using magnetic nano-particles during high-intensity focused ultrasound
Source: PLoS One. 2017 Apr 6;12(4):e0175093. doi: 10.1371/journal.pone.0175093 (PMC5383424; doi:10.1371/journal.pone.0175093)
Supplement: S1 File — Comparison of peak temperatures for different mNP concentrations and acoustic powers. (XLSX) [file pone.0175093.s001.xlsx]

## Sheet: Sheet1
Power	0						4.7e-05							0.00047
	Trial 1	Trial 2	Trial 3	Average	SD		Trial 1	Trial 2	Trial 3	Average	SD		Trial 1	Trial 2	Trial 3	Average	SD
5.2	6.1	5.6	5.1	5.6	0.408248		6.5	5.9	5.2	5.86667	0.531246		8.05	8.7	9.7	8.81667	0.678642
9.2	7.7	9.1	8.9	8.56667	0.618241		11.3	10.75	9.35	10.4667	0.820907		17.01	18.55	19.95	18.5033	1.03984
14.5	14.45	16.95	15.61	15.67	1.0215		20.6	18.9	18.05	19.1833	1.06014		30.05	28.1	33.8	30.65	2.04848
