# Supplementary material for: Enhanced thermal effect using magnetic nano-particles during high-intensity focused ultrasound
Source: PLoS One. 2017 Apr 6;12(4):e0175093. doi: 10.1371/journal.pone.0175093 (PMC5383424; doi:10.1371/journal.pone.0175093)
Supplement: S2 File — Comparison of thermal dose for different mNP concentrations and acoustic powers. (XLSX) [file pone.0175093.s002.xlsx]

## Sheet: Sheet1
		0						0.0047						0.047
Acoustic Power /Concentration				Average	SD					Average	SD					Average	SD
5.2	8e-11	7e-12	5.1e-10	1.99e-10	2.2192e-10		1.8e-07	1.34e-07	6e-08	1.24667e-07	4.94323e-08		2.1e-06	7.1e-06	1.11e-05	6.76667e-06	3.68179e-06
9.2	9.5e-07	3.3e-06	4.6e-06	2.95e-06	1.51052e-06		0.000102	8.5e-06	8.1e-06	3.95333e-05	4.41709e-05		0.095	0.223	12.1	4.13933	5.62928
14.5	6.1e-06	8.1e-06	0.000225	7.97333e-05	0.000102722		4.3	0.59	10.01	4.96667	3.87448		8	7300	30200	12502.7	12863.1
