# Supplementary material for: Enhanced thermal effect using magnetic nano-particles during high-intensity focused ultrasound
Source: PLoS One. 2017 Apr 6;12(4):e0175093. doi: 10.1371/journal.pone.0175093 (PMC5383424; doi:10.1371/journal.pone.0175093)
Supplement: S3 File — Acoustic powers required to obtain a lesion volume of 13.5 mm3 for different mNPs concentration. (XLSX) [file pone.0175093.s003.xlsx]

## Sheet: Sheet1
		Power required			Average	SD
	0% mNPs	39	34.5	35.5	36.3333	1.92931
	0.0047% mNPs	23	24	21.5	22.8333	1.0274
	0.047% mNPs	15	15.5	13.5	14.6667	0.849837
